# Supplementary material
Source: Springer Nature journal article supplement (https://www.springermedizin.de/resource/supplementary/12889_2011_4286_MOESM1_ESM.pdf/9491452)
Supplement: MOESM1 [file 9491452]

**Additional file 1 - Factors in the proximal determinants of alcohol consumption:  
attitude, social influence and self-efficacy**

| Items                                                                       | Factors                                            |                                                    |
|-----------------------------------------------------------------------------|----------------------------------------------------|----------------------------------------------------|
| Attitude (-2, +2)                                                           | Pros of alcohol <sup>a</sup><br>( $\alpha = .93$ ) | Cons of alcohol <sup>b</sup><br>( $\alpha = .95$ ) |
| <i>When I drink alcohol, ...</i>                                            |                                                    |                                                    |
| <i>... I feel more confident.</i>                                           | .80                                                |                                                    |
| <i>... I feel more confident when I am in company.</i>                      | .77                                                |                                                    |
| <i>... I feel happier.</i>                                                  | .76                                                |                                                    |
| <i>... it makes me funny.</i>                                               | .73                                                |                                                    |
| <i>... it makes it easier for me to approach others.</i>                    | .72                                                |                                                    |
| <i>... it makes me loosen up.</i>                                           | .71                                                |                                                    |
| <i>... I fit in better.</i>                                                 | .70                                                |                                                    |
| <i>... I get more attention from my friends.</i>                            | .70                                                |                                                    |
| <i>... I am not bored.</i>                                                  | .69                                                |                                                    |
| <i>... I can cope better with problems.</i>                                 | .68                                                |                                                    |
| <i>... I feel more relaxed.</i>                                             | .67                                                |                                                    |
| <i>... I have a lot of friends.</i>                                         | .66                                                |                                                    |
| <i>... people look up to me.</i>                                            | .65                                                |                                                    |
| <i>... I feel like somebody.</i>                                            | .62                                                |                                                    |
| <i>... it is exciting.</i>                                                  | .60                                                |                                                    |
| <i>... I relax.</i>                                                         | .60                                                |                                                    |
| <i>... I do not feel lonely.</i>                                            | .57                                                |                                                    |
| <i>... it helps with feelings of frustration, depression and/or stress.</i> | .53                                                |                                                    |
| <i>... my concentration improves.</i>                                       | .49                                                |                                                    |
| <i>... it is a pleasant/cosy feeling.</i>                                   | .49                                                |                                                    |
| <i>... I can more easily fall asleep.</i>                                   | .41                                                |                                                    |
| <i>... it makes me cause conflicts with others.</i>                         |                                                    | .87                                                |
| <i>... I have problems.</i>                                                 |                                                    | .84                                                |
| <i>... I get in conflict with others.</i>                                   |                                                    | .82                                                |
| <i>... the relationship with my partner becomes worse.</i>                  |                                                    | .81                                                |
| <i>... I feel ashamed.</i>                                                  |                                                    | .81                                                |
| <i>... I more often do things that I regret.</i>                            |                                                    | .80                                                |
| <i>... my condition gets worse.</i>                                         |                                                    | .77                                                |
| <i>... I have problems at work.</i>                                         |                                                    | .77                                                |
| <i>... I make mistakes.</i>                                                 |                                                    | .73                                                |
| <i>... it is bad for my brain.</i>                                          |                                                    | .71                                                |
| <i>... the risk of developing cancer increases.</i>                         |                                                    | .70                                                |
| <i>... I become aggressive.</i>                                             |                                                    | .69                                                |
| <i>... I cause traffic accidents.</i>                                       |                                                    | .68                                                |
| <i>... it impairs/decreases my sexual functioning.</i>                      |                                                    | .67                                                |
| <i>... I become emotional.</i>                                              |                                                    | .67                                                |
| <i>... it is bad for my health.</i>                                         |                                                    | .66                                                |
| <i>... I do not feel fit/well.</i>                                          |                                                    | .66                                                |
| <i>... the risk of developing cardiovascular diseases increases.</i>        |                                                    | .65                                                |
| <i>... it is bad for my liver.</i>                                          |                                                    | .65                                                |
| <i>... I get tired.</i>                                                     |                                                    | .59                                                |
| <i>... the hangover is a disadvantage.</i>                                  |                                                    | .58                                                |
| <i>... I become more stupid.</i>                                            |                                                    | .54                                                |
| <i>... I do not sleep well.</i>                                             |                                                    | .50                                                |
| <i>... it costs a lot.</i>                                                  |                                                    | .44                                                |

| <b>Social influence (-2, +2)</b>                                                          | <b>Modeling<sup>c</sup></b><br>( $\alpha = .70$ )  | <b>Support<sup>d</sup></b><br>( $\alpha = .85$ )      |                                                     |
|-------------------------------------------------------------------------------------------|----------------------------------------------------|-------------------------------------------------------|-----------------------------------------------------|
| <i>My partner does not drink more than two glasses* of alcohol per day.</i>               | .88                                                |                                                       |                                                     |
| <i>My family do not drink more than two glasses* of alcohol per day.</i>                  | .83                                                |                                                       |                                                     |
| <i>My friends do not drink more than two glasses* of alcohol per day.</i>                 | .66                                                |                                                       |                                                     |
| <i>My colleagues do not drink more than two glasses* of alcohol per day.</i>              | .51                                                |                                                       |                                                     |
| <i>My partner encourages me not to drink more than two glasses* of alcohol per day.</i>   |                                                    | .88                                                   |                                                     |
| <i>My family encourage me not to drink more than two glasses* of alcohol per day.</i>     |                                                    | .88                                                   |                                                     |
| <i>My friends encourage me not to drink more than two glasses* of alcohol per day.</i>    |                                                    | .84                                                   |                                                     |
| <i>My colleagues encourage me not to drink more than two glasses* of alcohol per day.</i> |                                                    | .76                                                   |                                                     |
| <b>Self-efficacy</b>                                                                      | <b>Social SE<sup>e</sup></b><br>( $\alpha = .94$ ) | <b>Emotional SE<sup>e</sup></b><br>( $\alpha = .97$ ) | <b>Routine SE<sup>e</sup></b><br>( $\alpha = .88$ ) |
| <i>I am able to drink no more than two glasses* of alcohol ...</i>                        |                                                    |                                                       |                                                     |
| <i>... when someone offers me a drink.</i>                                                | .92                                                |                                                       |                                                     |
| <i>... when there is something to celebrate.</i>                                          | .91                                                |                                                       |                                                     |
| <i>... when I am at a party.</i>                                                          | .90                                                |                                                       |                                                     |
| <i>... when I am at a café or restaurant.</i>                                             | .83                                                |                                                       |                                                     |
| <i>... when I see people around me drinking alcohol.</i>                                  | .78                                                |                                                       |                                                     |
| <i>... when I see somebody else enjoying a drink.</i>                                     | .61                                                |                                                       |                                                     |
| <i>... when others criticize me when I do not want to drink.</i>                          | .55                                                |                                                       |                                                     |
| <i>... when I experience feelings of depression.</i>                                      |                                                    | .98                                                   |                                                     |
| <i>... when I am sad.</i>                                                                 |                                                    | .97                                                   |                                                     |
| <i>... when I feel stressed or nervous.</i>                                               |                                                    | .94                                                   |                                                     |
| <i>... when I have problems.</i>                                                          |                                                    | .93                                                   |                                                     |
| <i>... when I am in a bad mood.</i>                                                       |                                                    | .91                                                   |                                                     |
| <i>... when I am annoyed, angry or frustrated.</i>                                        |                                                    | .87                                                   |                                                     |
| <i>... when I cannot fall asleep.</i>                                                     |                                                    | .79                                                   |                                                     |
| <i>... when I am around others and feel uncomfortable.</i>                                |                                                    | .74                                                   |                                                     |
| <i>... when I cannot concentrate.</i>                                                     |                                                    | .67                                                   |                                                     |
| <i>... when I am bored.</i>                                                               |                                                    | .67                                                   |                                                     |
| <i>... when I get up in the morning.</i>                                                  |                                                    |                                                       | .98                                                 |
| <i>... when I have a break.</i>                                                           |                                                    |                                                       | .94                                                 |
| <i>... after doing sports.</i>                                                            |                                                    |                                                       | .63                                                 |
| <i>... during lunch or dinner.</i>                                                        |                                                    |                                                       | .52                                                 |
| <i>... when I see or smell alcohol.</i>                                                   |                                                    |                                                       | .46                                                 |

Note. \*This item refers to females (three glasses for males). <sup>a</sup>+2 = positive attitude, -2 = negative attitude; <sup>b</sup>+2 = negative attitude, -2 = positive attitude; <sup>c</sup>+2 = positive modeling, -2 = negative modeling; <sup>d</sup>+2 = high social support, -2 = low social support; <sup>e</sup>+2 = high self-efficacy, -2 = low self-efficacy
